# Supplementary material for: Clathrin regulates the β-arrestin pathway regardless of ligand bias
Source: Research Square preprint supplement (doi:10.21203/rs.3.rs-666661/v2), 2021-11-04
Supplement: Supplementary file 1 [file 9ea86a17a45b63472d0b9aca.pdf]

a

Alignment search: beta-arrestin-1 isoformA (ARRB1) and beta-arrestin-2 isoform3 (ARRB2)

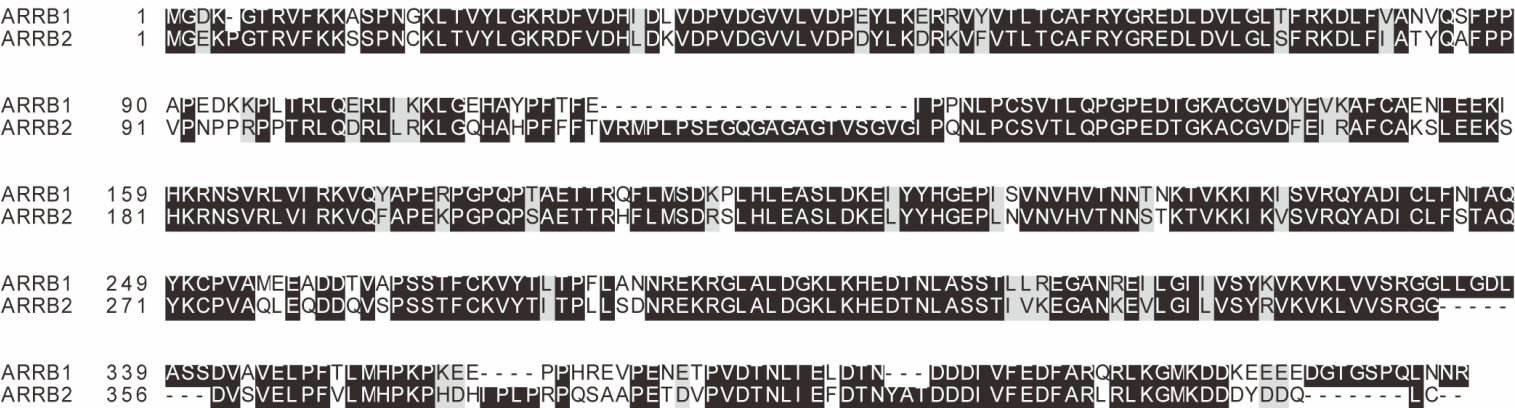

b

|                           |                           | Percent Identity | E value                 |
|---------------------------|---------------------------|------------------|-------------------------|
| beta-arrestin-1 Isoform A | beta-arrestin-2 Isoform 1 | 76.14%           | 0                       |
|                           | 2                         | 73.25%           | 0                       |
|                           | 3                         | 72.48%           | 0                       |
|                           | 4                         | 80.46%           | 8.00×10 <sup>-150</sup> |
|                           | 5                         | 74.00%           | 0                       |
|                           | 6                         | 71.19%           | 0                       |
|                           | 7                         | 73.09%           | 4.00×10 <sup>-112</sup> |

|                           |                           | Percent Identity | E value                 |
|---------------------------|---------------------------|------------------|-------------------------|
| beta-arrestin-1 Isoform B | beta-arrestin-2 Isoform 1 | 77.64%           | 0                       |
|                           | 2                         | 74.69%           | 0                       |
|                           | 3                         | 73.83%           | 0                       |
|                           | 4                         | 80.46%           | 9.00×10 <sup>-153</sup> |
|                           | 5                         | 75.42%           | 0                       |
|                           | 6                         | 72.55%           | 0                       |
|                           | 7                         | 75.81%           | 4.00×10 <sup>-115</sup> |

Extended data Figure 1. Homology in amino acid sequence between β-arrestin 1 and 2, as searched by BLAST in the NCBI database.

a. Alignment search between β-arrestin 1 isoform A and β-arrestin 2 isoform 3 as a representative diagram. BOXSHADE version 3.21 was used. b. β-arrestin 1 isoform A and B were compared with β-arrestin 2 isoforms.

**a**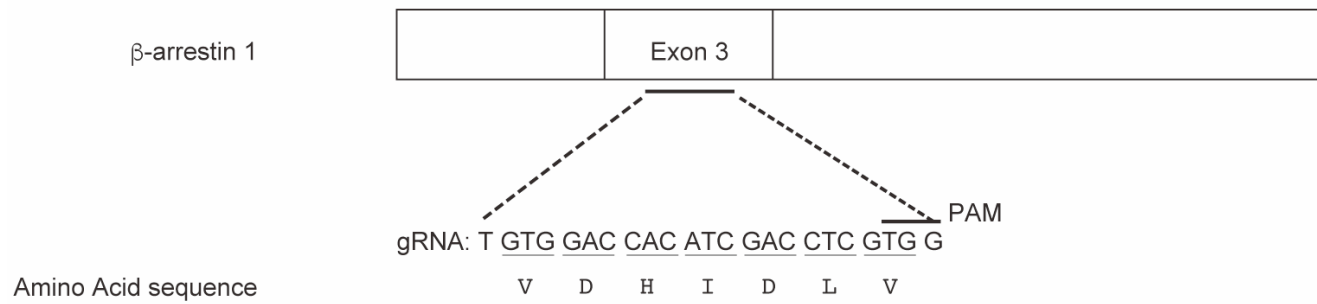**b**

Edited genome

1bp Ins : T GTG GAC CAC ATC GAC CCT CGT GG

T G T G G A C C A C C A T C G A C C C T C G T G G

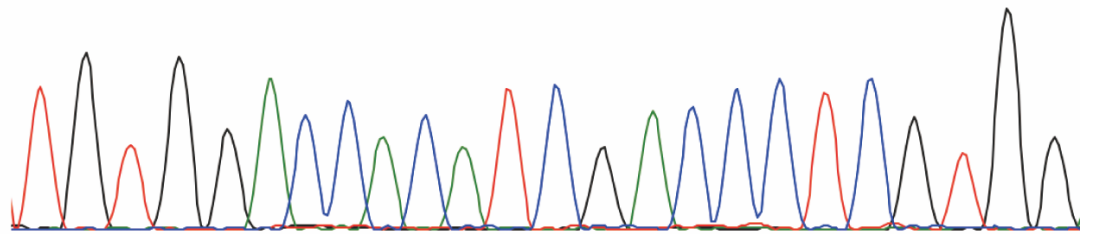

Amino Acid Sequence

WT allele:

VDHIDLVPVDGVVLVDPE

Mutated allele:

VDHIDPRGPCGWCPPGS\*

**c**

Immunoblotting

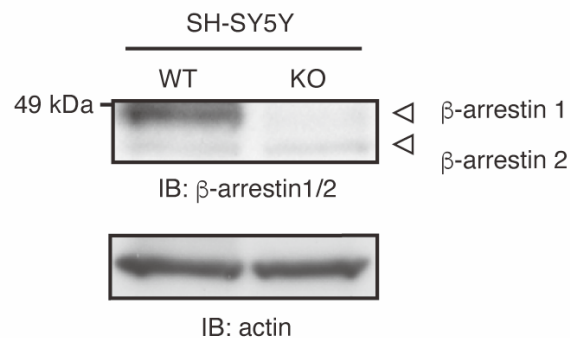

### Extended data Figure 2. Genetic depletion of $\beta$ -arrestin 1 in SH-SY5Y cells with use of CRISPR/Cas9.

The gRNA design (a) as well as obtained genomic and amino acid sequence (b) for establishing knockout cell lines using CRISPR/Cas9. Western blotting analysis was conducted to confirm the loss of  $\beta$ -arrestin 1 expression.

Extended Data Figure 3

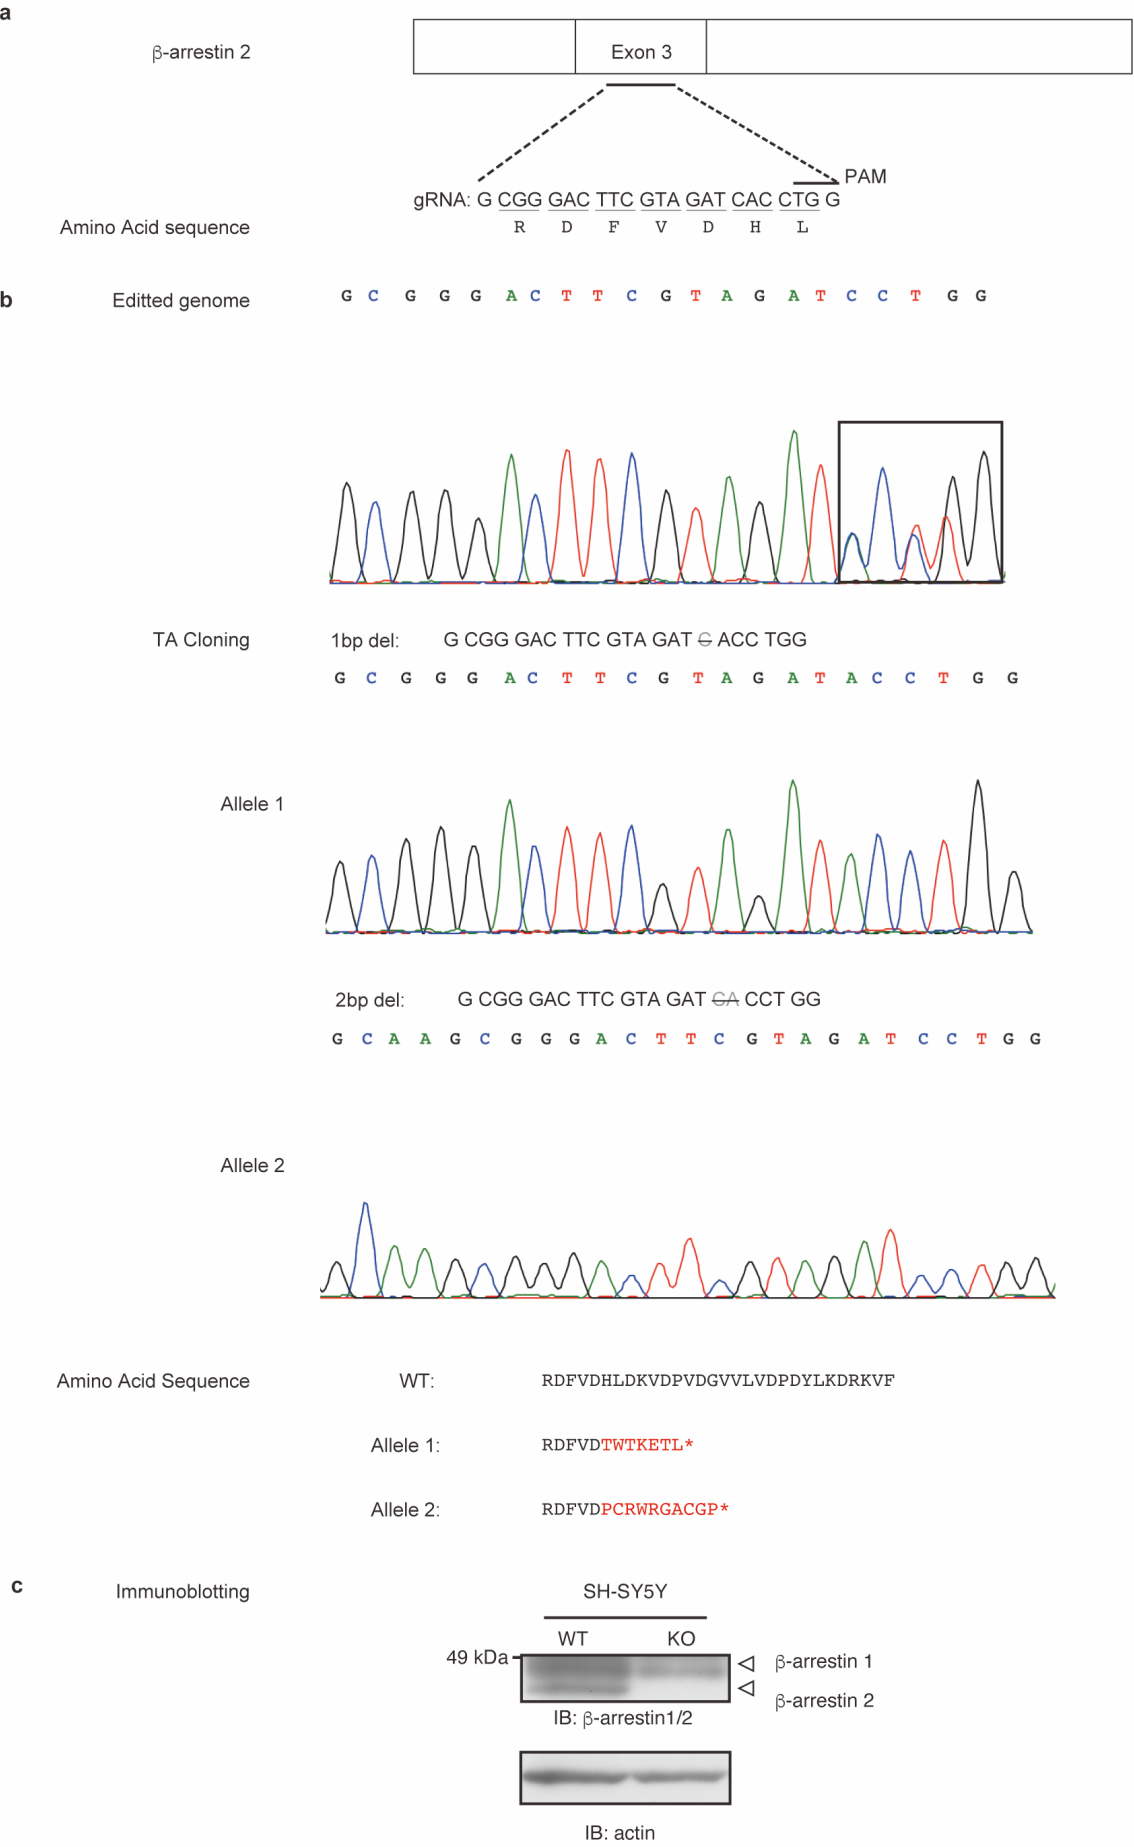

**Extended data Figure 3. Genetic depletion of  $\beta$ -arrestin 2 in SH-SY5Y cell with use of CRISPR/Cas9.**

The gRNA design (a) as well as obtained genomic and amino acid sequence (b) for establishing knockout cell lines using CRISPR/Cas9. Western blotting analysis was performed to confirm the loss of  $\beta$ -arrestin 2 expression.

**a** \* SH-SY5Y cells whose background is lacking  $\beta$ -arrestin 2 (The detail is shown in Extended Data 3).

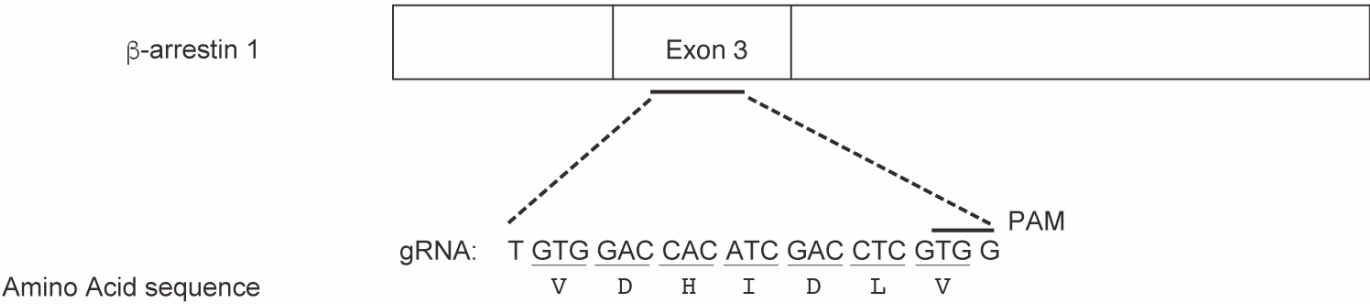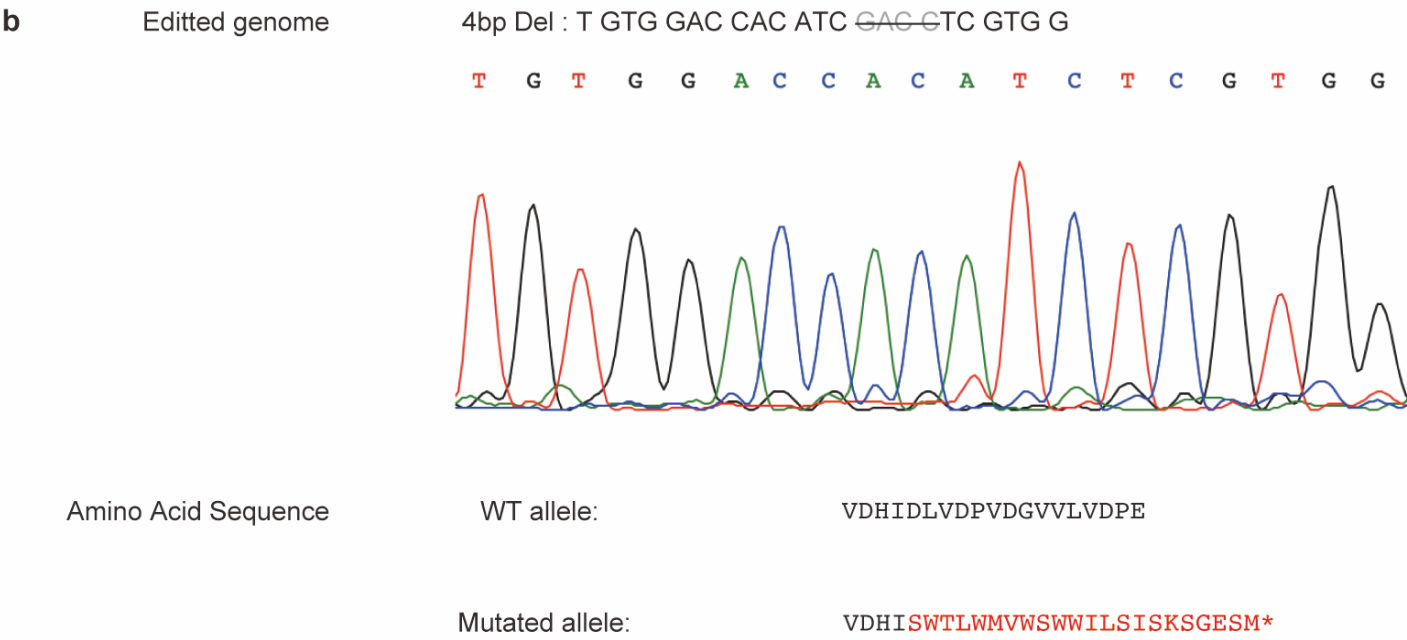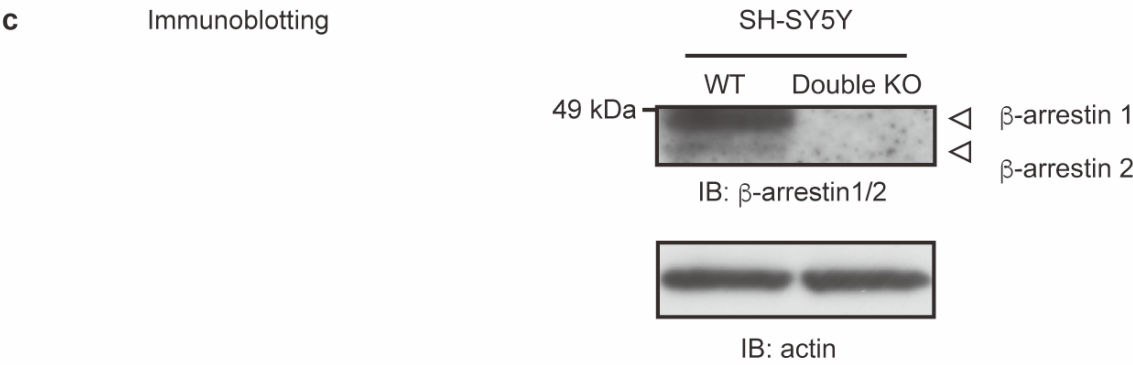

**Extended data Figure 4 Genetic depletion of both  $\beta$ -arrestin 1 and 2 simultaneously in SH-SY5Y cell with use of CRISPR/Cas9.**

The gRNA design (a) as well as obtained genomic and amino acid sequence (b) for establishing knockout cell lines using CRISPR/Cas9. Western blotting analysis was used to confirm the simultaneous loss of expression of both  $\beta$ -arrestin 1 and 2.

Extended Data Figure 5

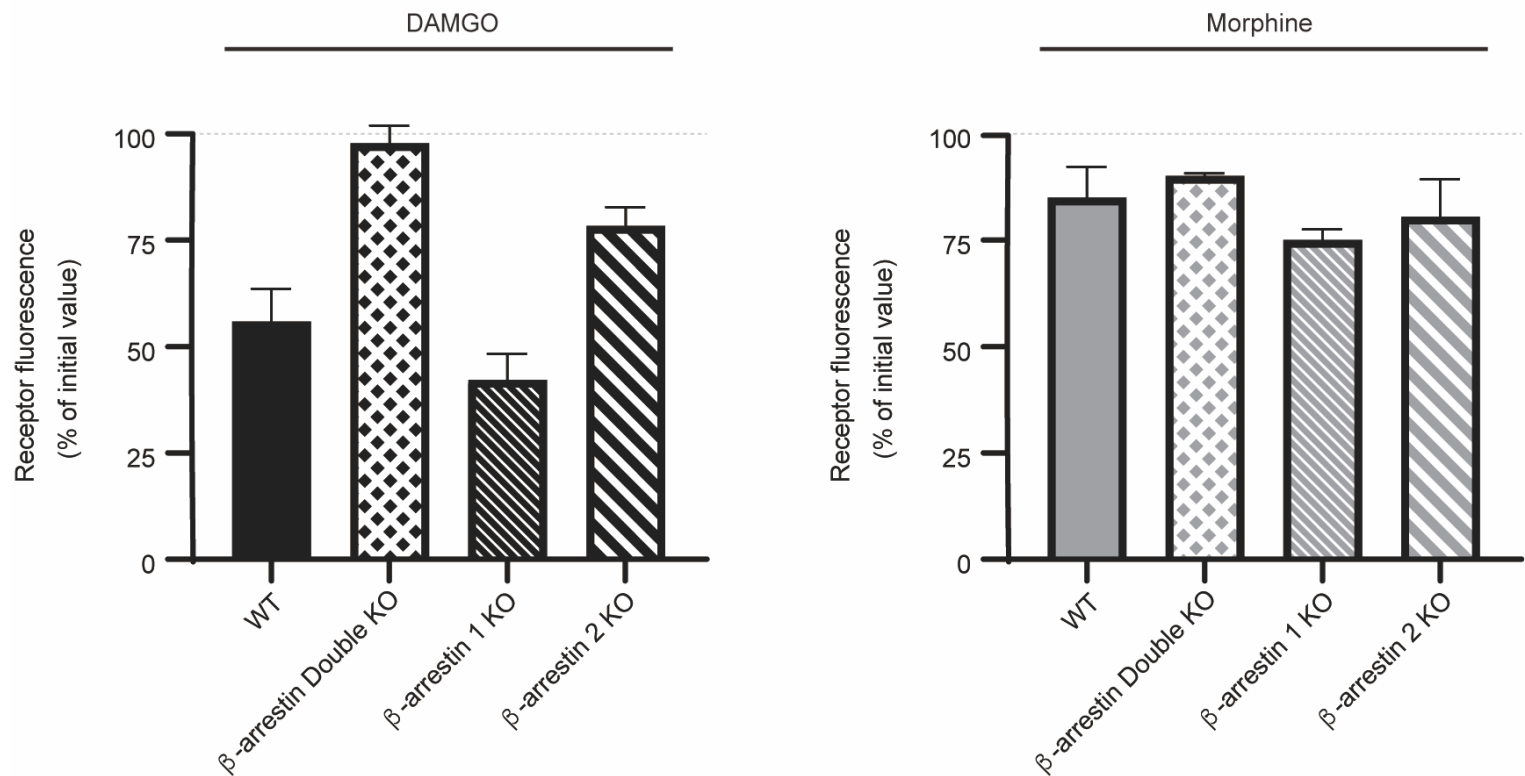

**Extended data Figure 5 MOP internalisation in  $\beta$ -arrestin deficient cell line at an earlier time point on stimulation with DAMGO or Morphine.**

MOP internalisation under the simultaneous loss of both  $\beta$ -arrestin 1 and 2, or either one of the  $\beta$ -arrestins in SH-SY5Y cells overexpressing HA-tagged MOR1 upon stimulation with 10  $\mu$ M of DAMGO (left panel) or morphine (right panel) as indicated for 10 min.

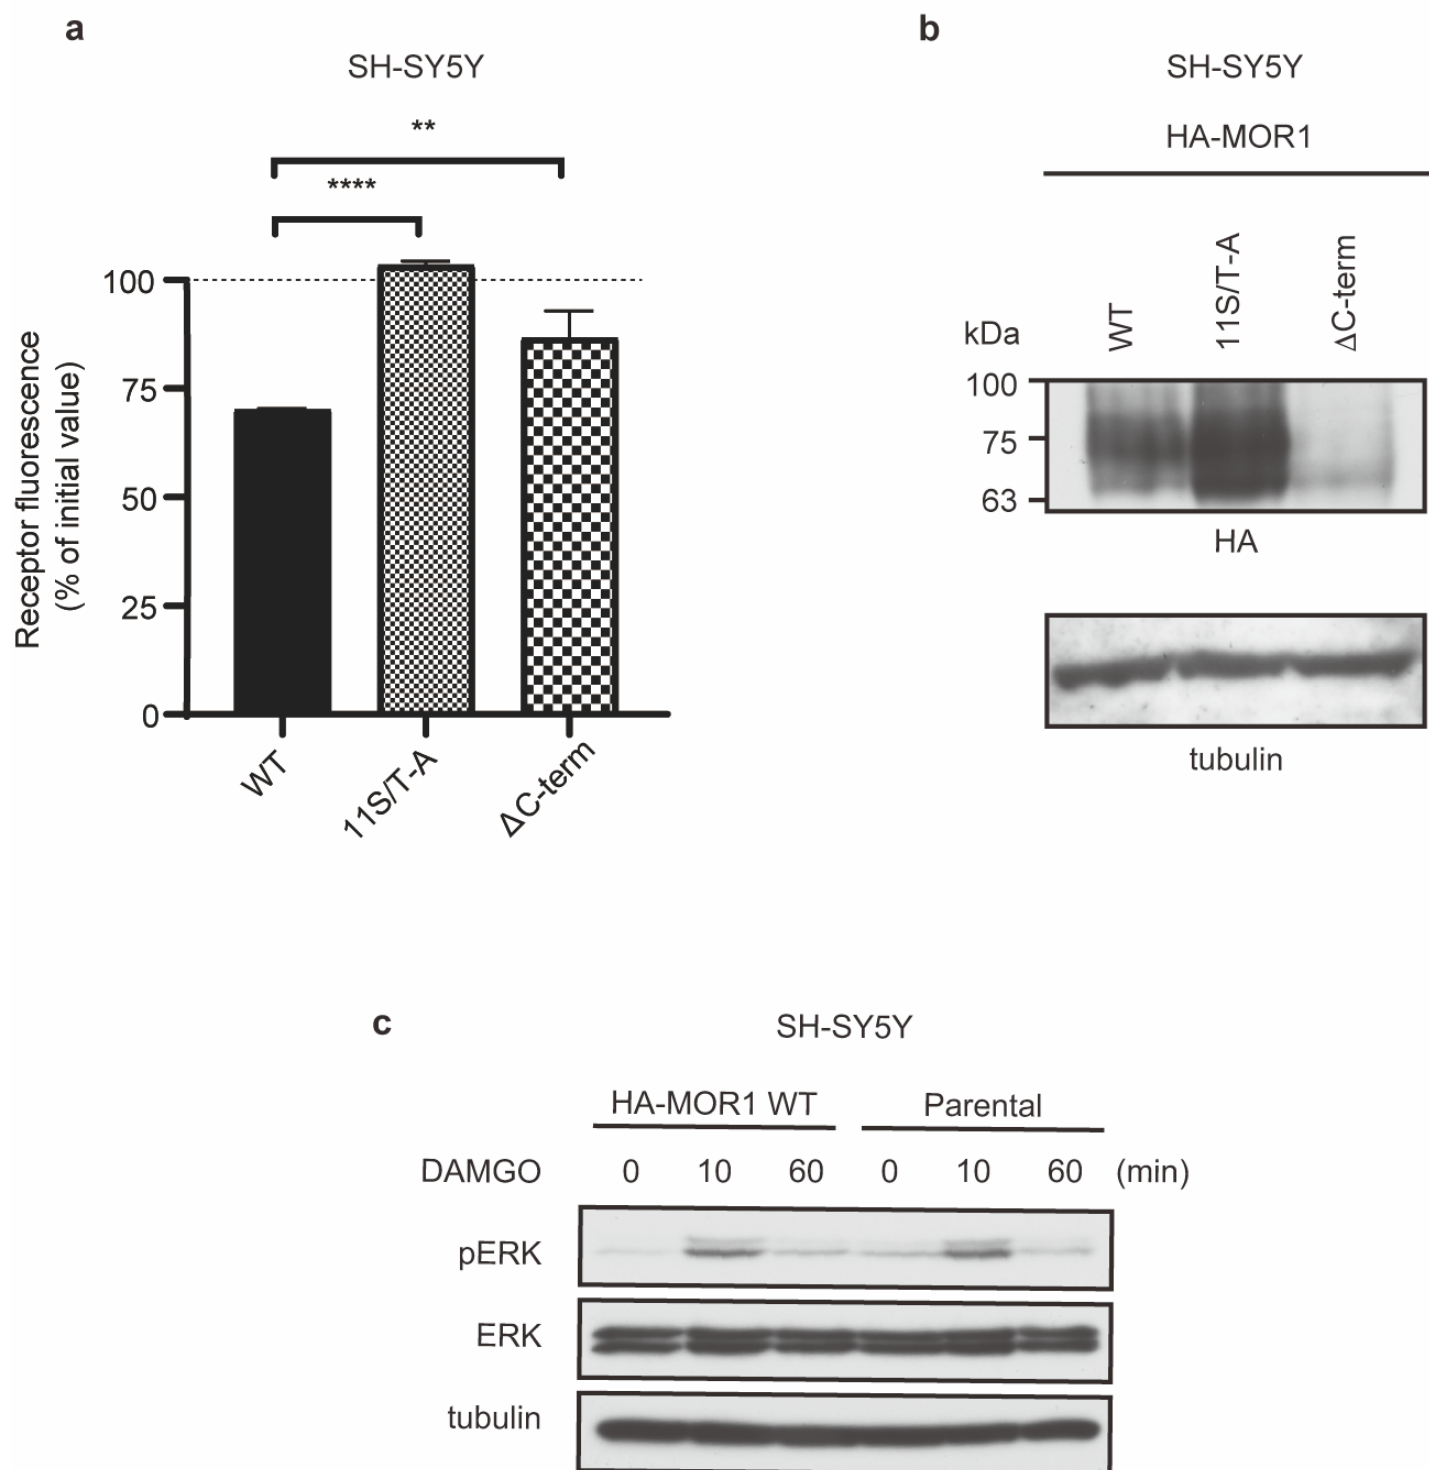

**Extended data Figure 6. Endogenous MOP drives MAPK signalling almost comparably to ectopically overexpressed MOP in SH-SY5Y cells.**

a. Receptor internalisation when wild-type or mutated MOP tagged with HA sequence were transfected into SH-SY5Y cells and stimulated with 10  $\mu$ M of DAMGO for 10 min (\*\* $P < 0.01$ , \*\*\*\* $P < 0.0001$ ). b. The expression level of wild-type or mutated MOP expressed in SH-SY5Y cells was analysed by immunoblotting. c. Immunoblot analysis of MAPK activation in whole-cell lysates from SH-SY5Y cells stably expressing wild-type MOP (left) in comparison with the parental cells (right).

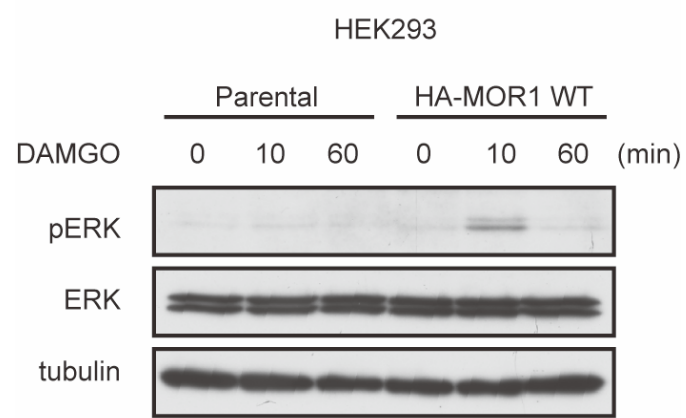

**Extended data Figure 7 Ectopical expression system discerns the signals from stably expressed MOP in HEK293 cells.**

Immunoblot analysis of MAPK activation in whole-cell lysates from HEK293 cells stably expressing wild-type MOP (right) in comparison with the parental cells (left).

Extended Data Figure 8

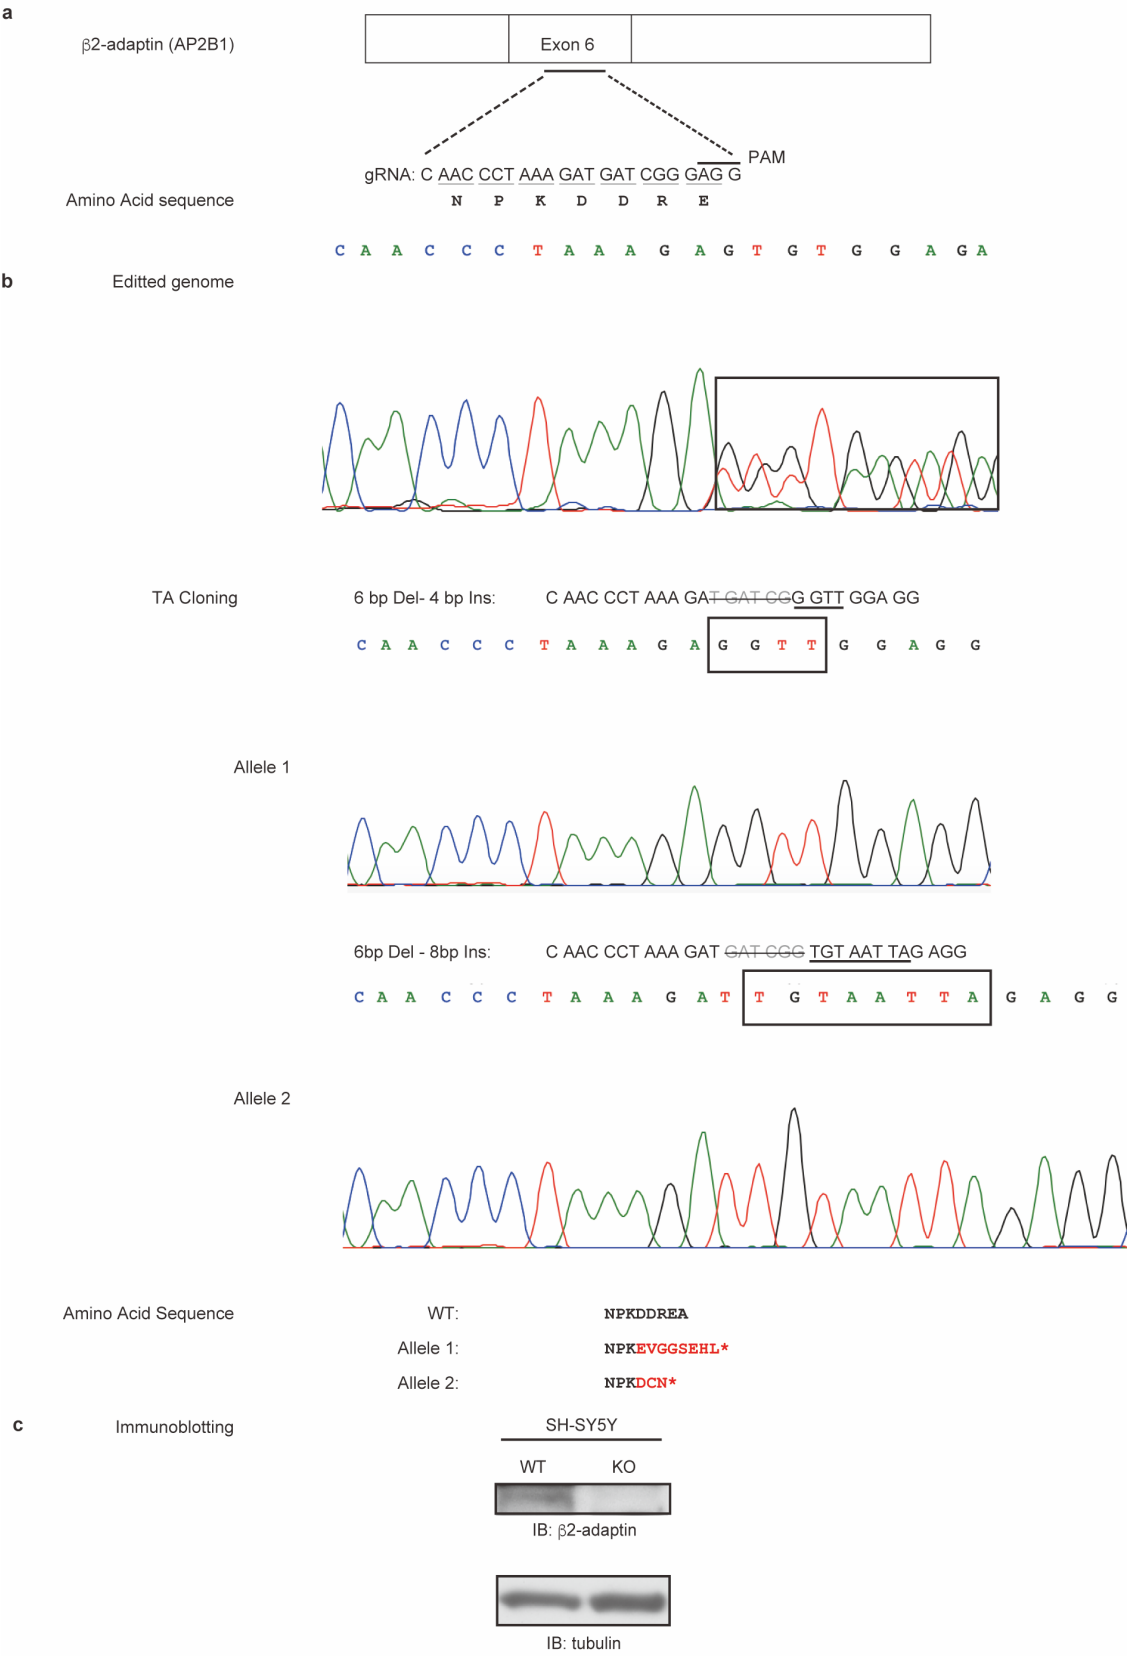

**Extended data Figure 8. Genetic depleting of  $\beta$ 2-adaptin with CRISPR/Cas9 in SH-SY5Y cells.**

The gRNA design (a) as well as obtained genomic and amino acid sequence (b) for establishing knockout cell lines using CRISPR/Cas9. c. Western blotting analysis was conducted to confirm the loss of expression of the  $\beta$ 2-adaptin subunit of the AP2 adaptor complex.



**a** Clathrin heavy chain (CLTC)

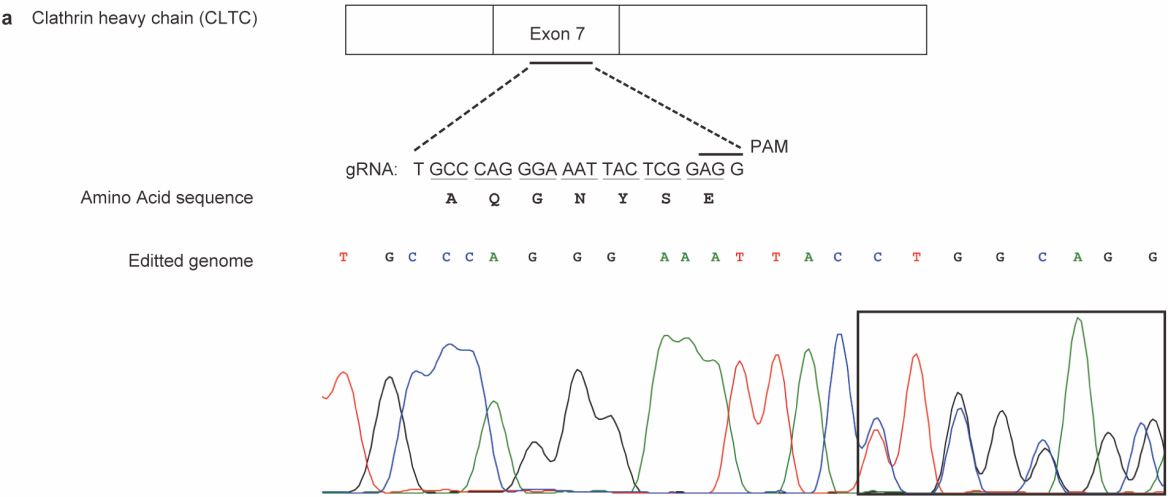

**b** TA Cloning

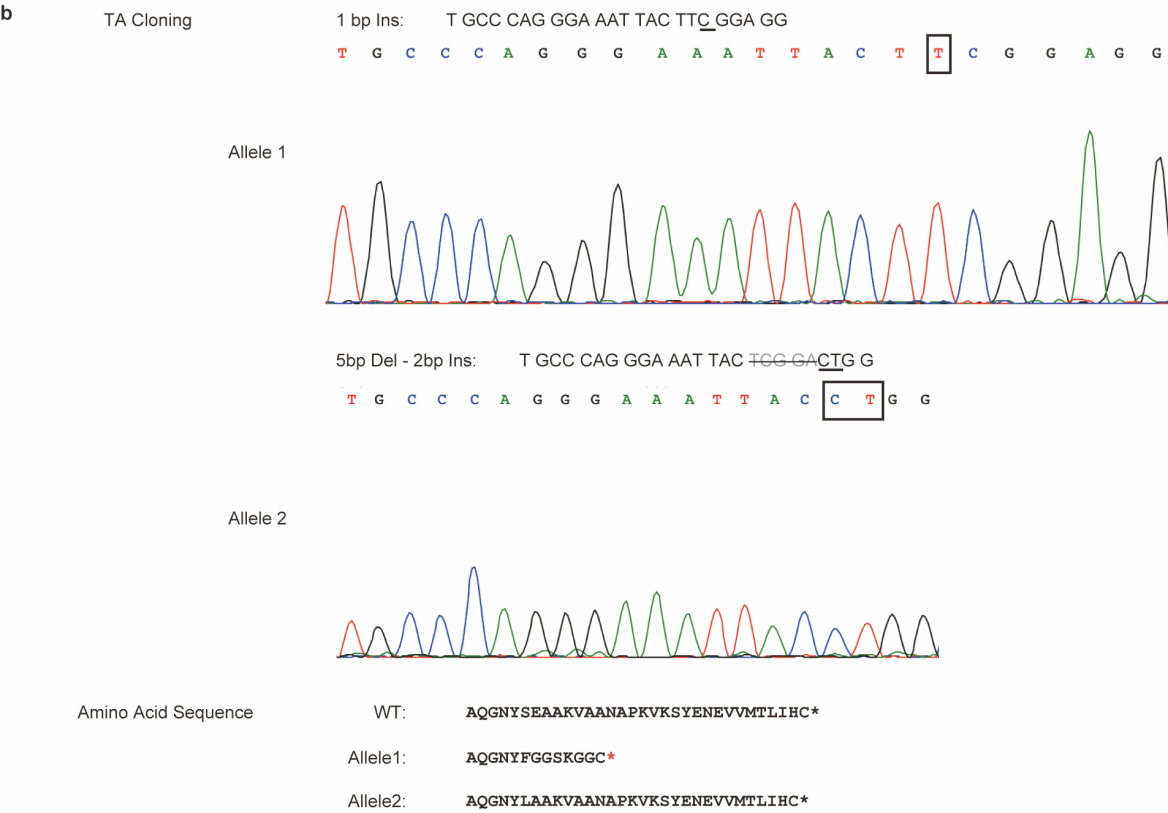

**c** Immunoblotting

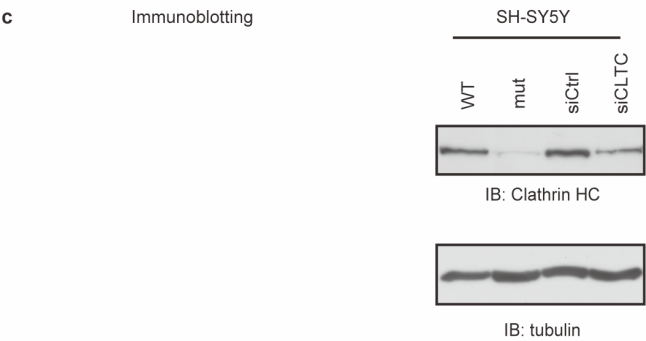

**Extended data Figure 9. Introducing mutation on clathrin heavy chain with CRISPR/Cas9.**

The gRNA design (a) as well as obtained genomic and amino acid sequence (b) for establishing knockout cell lines using CRISPR/Cas9. c. Western blotting analysis was performed to confirm the reduction of the expression level of clathrin heavy chains. Sample of cell cultures obtained by the knockdown method were used as references.
